# Supplementary material for: Self-adaptation of a conformationally flexible yet restricted “piperazine-pyrazine” building block toward the design of coordination polymers
Source: Royal Society of Chemistry journal article supplement (doi:10.1039/c0ce00703j), 2011-01-01
Supplement: c0ce00703j.pdf [file c0ce00703j.pdf]

Supporting Information for

**Self-adaptation of a conformationally flexible yet restricted  
“piperazine-pyrazine” building block toward the design of  
coordination polymers**

Chin-Fen Lee,<sup>ab</sup> Shu-Chun Hsu,<sup>ab</sup> Kai-Chao Chan,<sup>ab</sup> Mohammad Nurnabi,<sup>a</sup>  
Chung-Chou Lee,<sup>a</sup> Jing-Yun Wu,<sup>\*b</sup> Long-Li Lai,<sup>\*b</sup> and Kuang-Lieh Lu<sup>\*a</sup>

<sup>a</sup>*Institute of Chemistry, Academia Sinica, Taipei 115, Taiwan. Fax: +886-2-27831237.*

*E-mail: lu@chem.sinica.edu.tw.*

<sup>b</sup>*Department of Applied Chemistry, National Chi Nan University, Nantou 545, Taiwan*

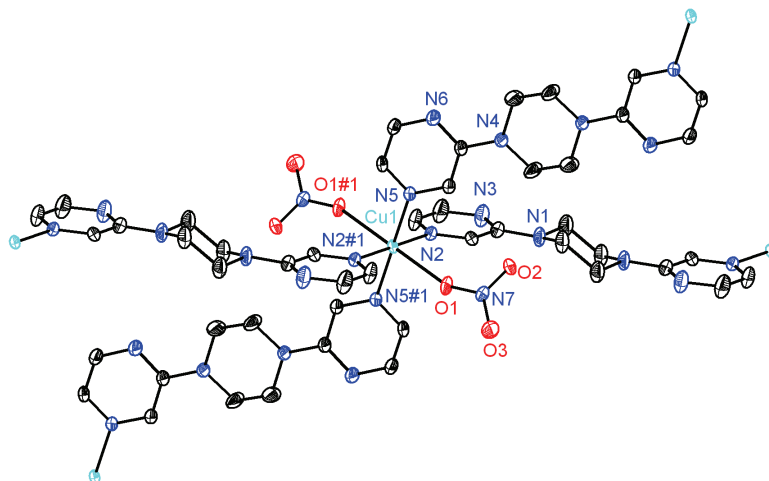

**Fig. S1** ORTEP plot of the coordination environment around  $\text{Cu}^{2+}$  ion in **1** with 50% thermal ellipsoid probability. Symmetric code: #1  $-x, -y+2, -z+1$ .

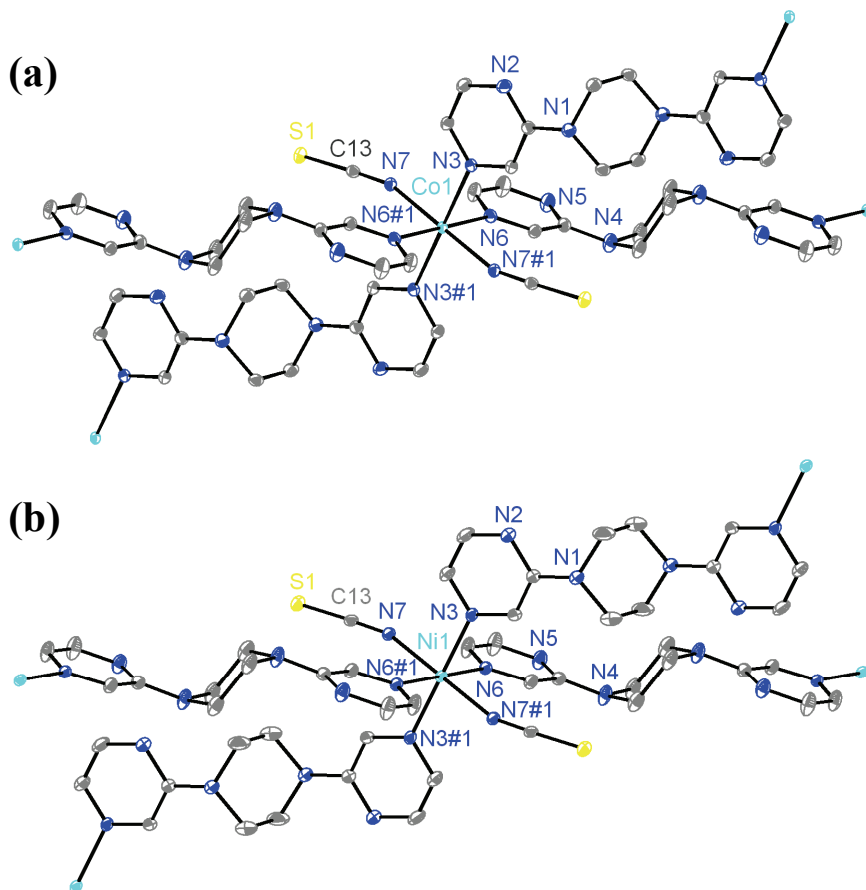

**Fig. S2** (a) ORTEP plot of the coordination environment around  $\text{Co}^{2+}$  ion in **2** with 30% thermal ellipsoid probability. Symmetric code: #1  $-x+1/2, -y+3/2, -z$ . (b) ORTEP plot of the coordination environment around  $\text{Ni}^{2+}$  ion in **3** with 15% thermal ellipsoid probability. Symmetric code: #1  $-x+1/2, -y+3/2, -z$ .

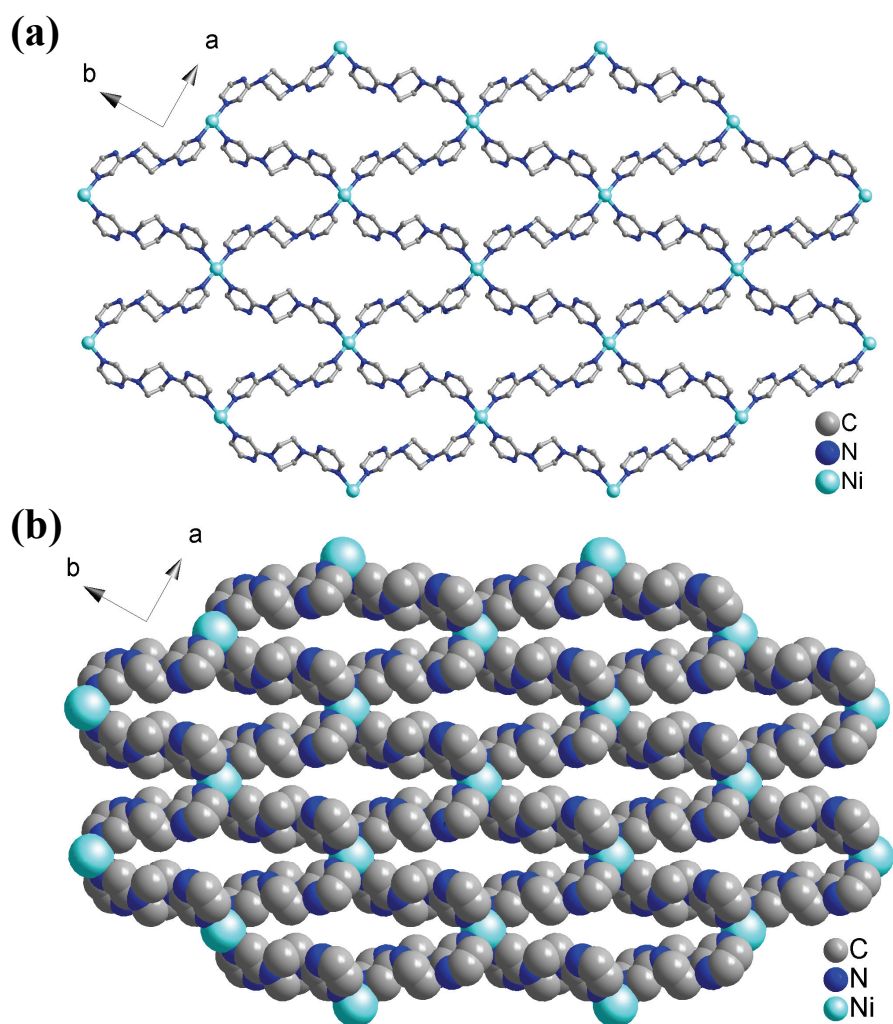

**Fig. S3** (a) Ball-and-stick and (b) space-filling representations of the Ni(bpzp)-based topologically (4,4)-layer structure with each metal center as a four-connected node and each bpzp ligand as a 2-connected linear linkage in **3**. Thiocyanate anions and hydrogen atoms are omitted for clarity.

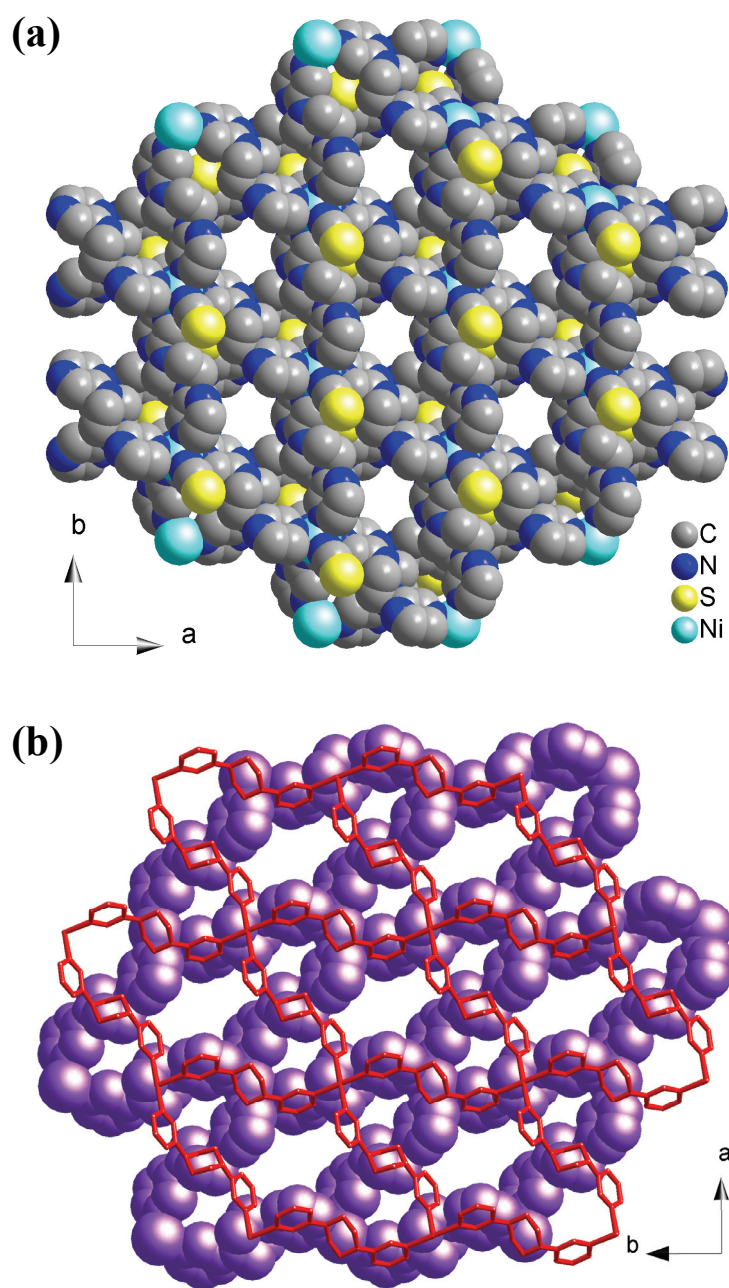

**Fig. S4** Packing diagrams of **3**: (a) Space-filling model showing hexagonal-shaped channel openings along the crystallographic *c*-axis. (b) Highlighting the ABAB layer-stacking with a rotation angle of  $60^\circ$  between the two neighboring layers.

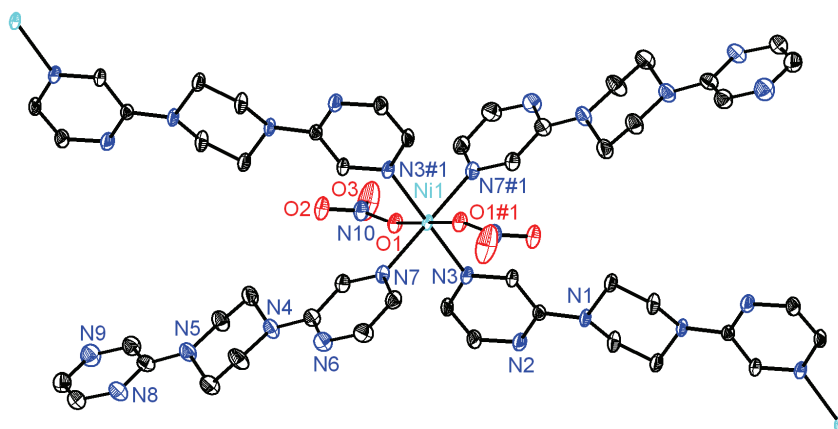

**Fig. S5** ORTEP plot of the coordination environment around Ni<sup>2+</sup> ion in **4** with 50% thermal ellipsoid probability. Symmetric code: #1  $-x+1, -y+1, -z+1$ .

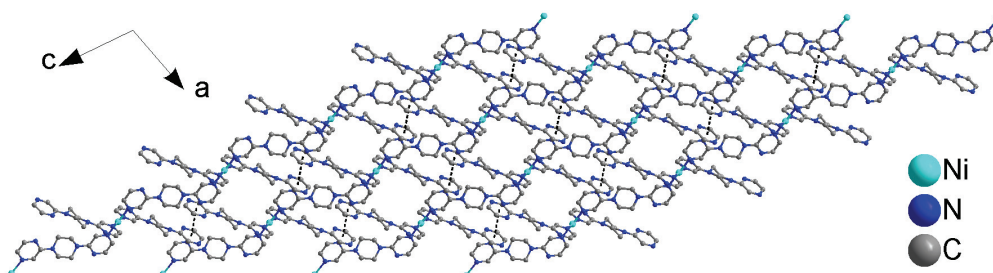

**Fig. S6** Weak  $\pi$ - $\pi$  interactions (dashed lines) assisted 2D supramolecular layer structure in **4** viewed down the crystallographic *b*-axis. Nitrate anions and hydrogen atoms are omitted for clarity.

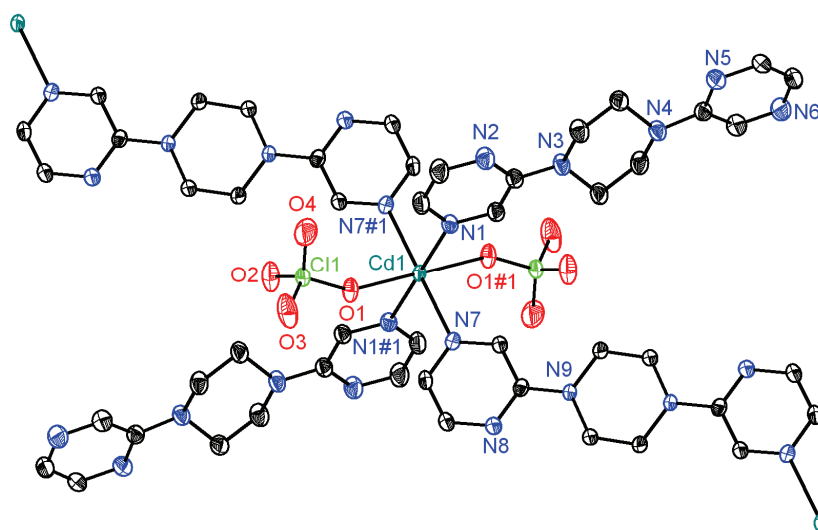

**Fig. S7** ORTEP plot of the coordination environment around Cd<sup>2+</sup> ion in **5** with 50% thermal ellipsoid probability. Symmetric code: #1 -x+2, -y, -z+1.

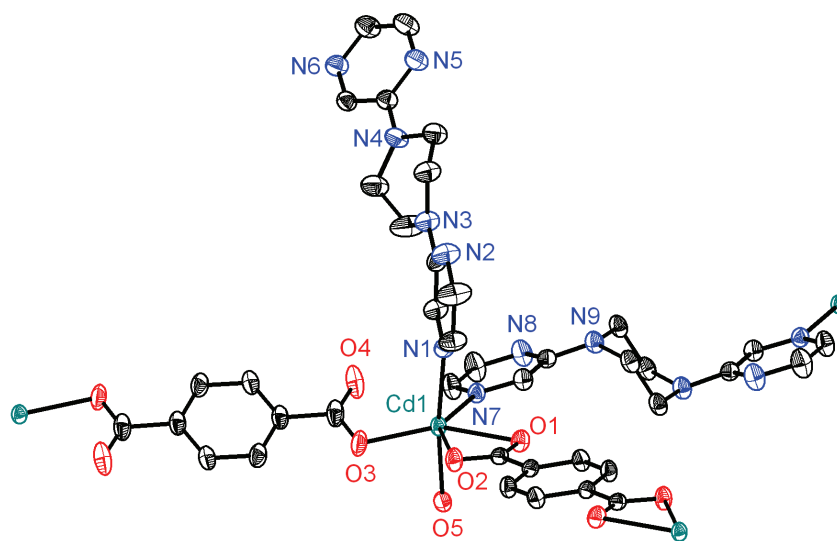

**Fig. S8** ORTEP plot of the coordination environment around the Cd<sup>2+</sup> ion in **6** with 50% thermal ellipsoid probability. The hydrogen atoms are omitted for clarity.

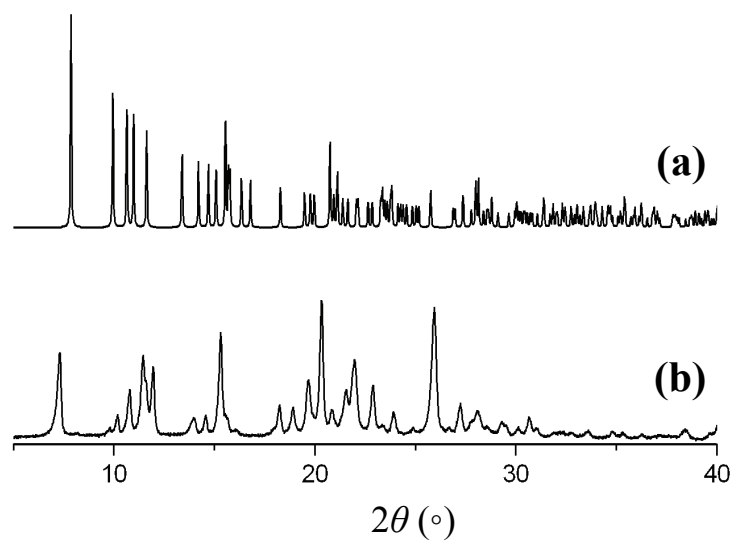

**Fig. S9** Powder X-ray diffraction patterns of  $1 \cdot 3\text{H}_2\text{O}$ . (a) Simulated from the single-crystal data. (b) A freshly grounded sample at room temperature.

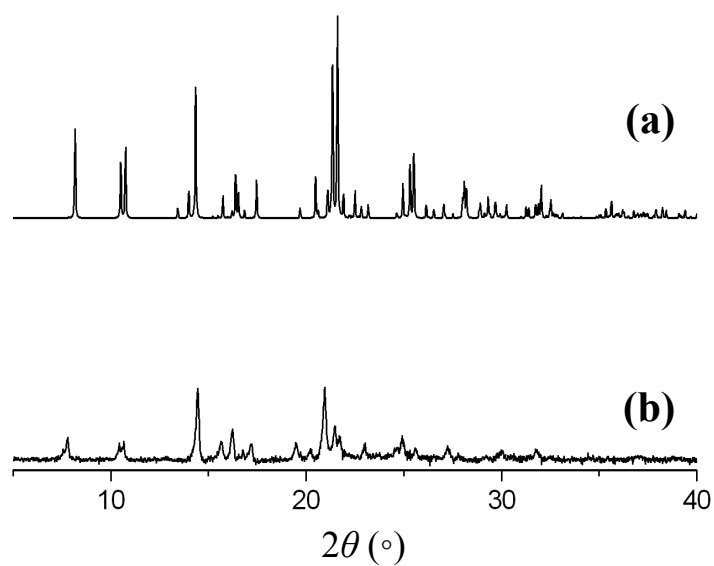

**Fig. S10** Powder X-ray diffraction patterns of  $2 \cdot \text{CH}_2\text{Cl}_2 \cdot 2\text{CH}_3\text{OH}$ . (a) Simulated from the single-crystal data. (b) A freshly grounded sample at room temperature.

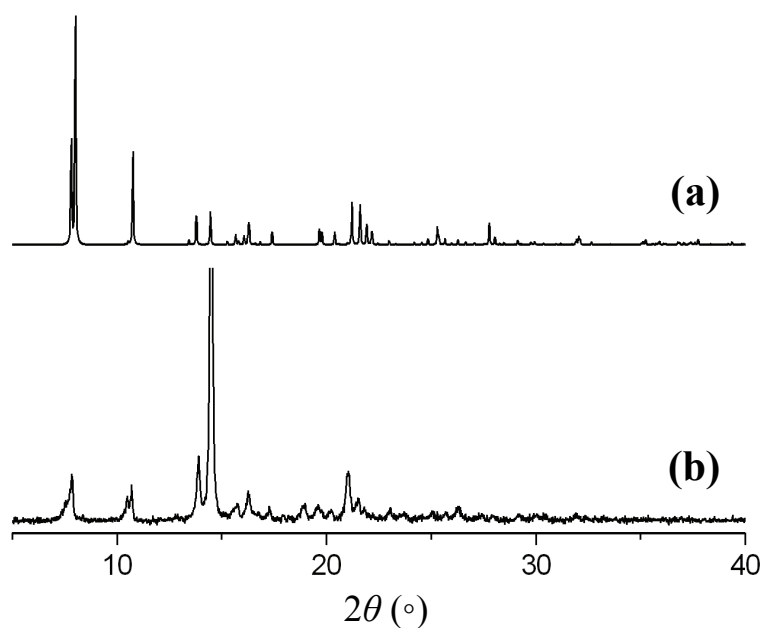

**Fig. S11** Powder X-ray diffraction patterns of 3·4CH<sub>3</sub>OH. (a) Simulated from the single-crystal data. (b) A freshly grounded sample at room temperature.

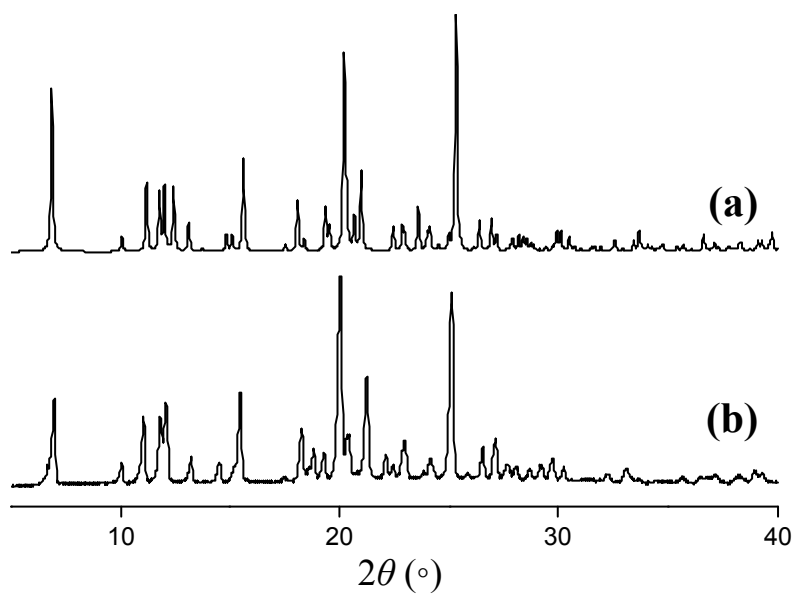

**Fig. S12** Powder X-ray diffraction patterns of 4. (a) Simulated from the single-crystal data. (b) A freshly grounded sample at room temperature.



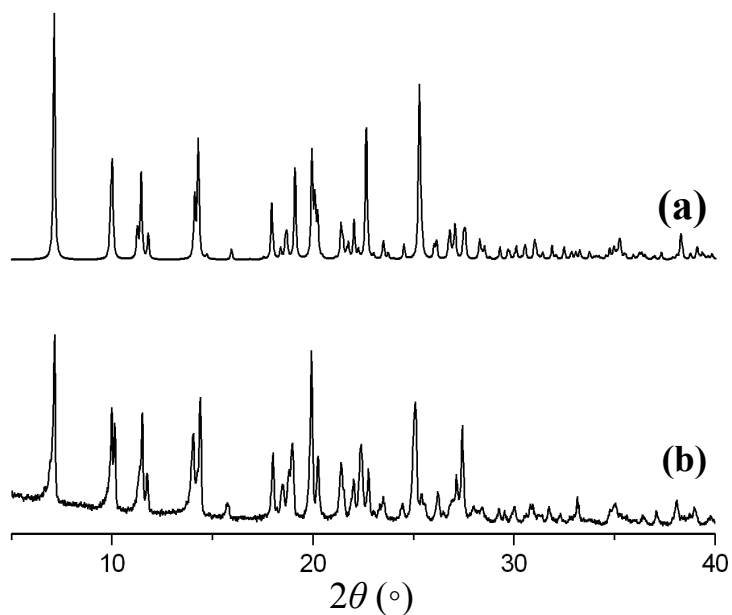

**Fig. S13** Powder X-ray diffraction patterns of **5**. (a) Simulated from the single-crystal data. (b) A freshly grounded sample at room temperature.

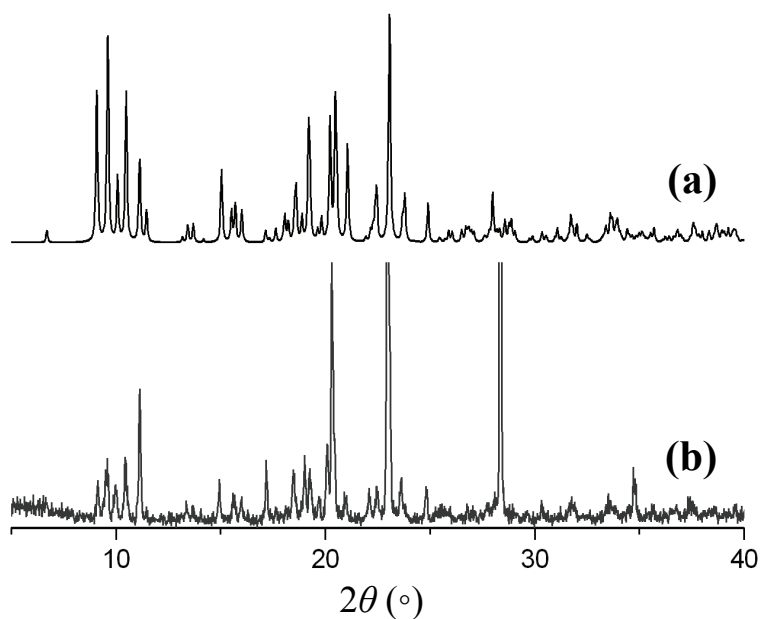

**Fig. S14** Powder X-ray diffraction patterns of **6**·H<sub>2</sub>O. (a) Simulated from the single-crystal data. (b) A freshly grounded sample at room temperature.

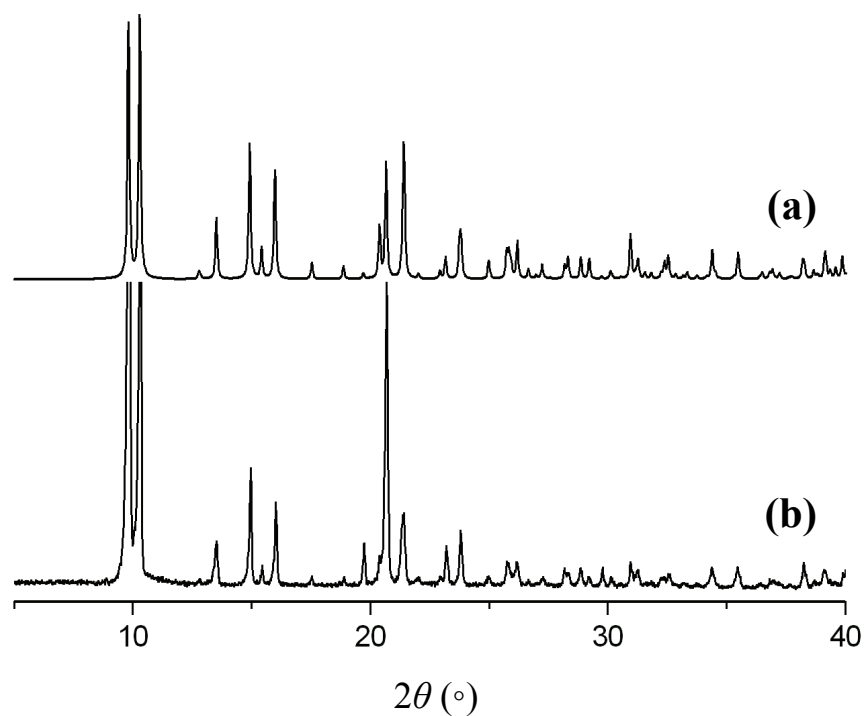

**Fig. S15** Powder X-ray diffraction patterns of **7**. (a) Simulated from the single-crystal data. (b) A freshly grounded sample at room temperature.

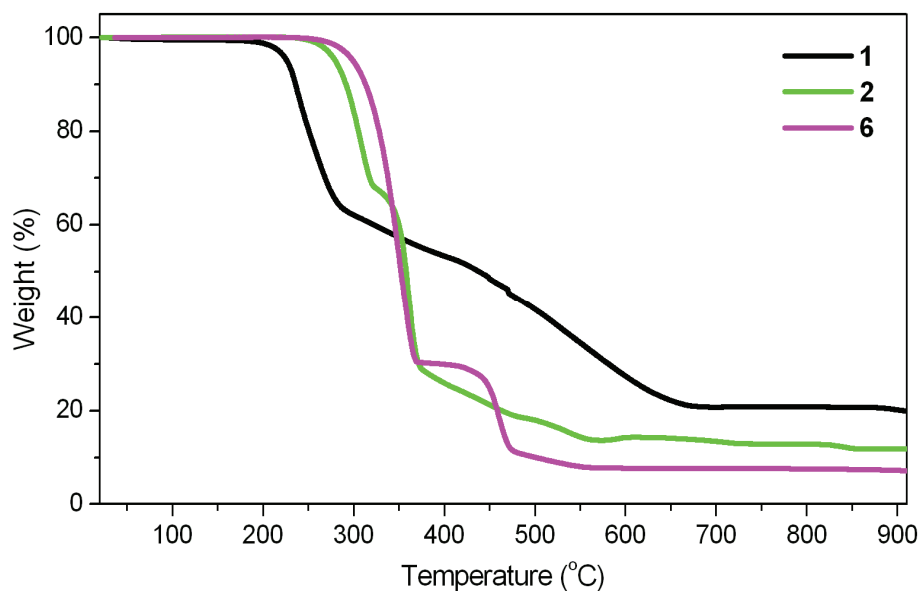

**Fig. S16** Thermal stabilities of the evacuated materials of  $1 \cdot 2\text{H}_2\text{O}$ ,  $2 \cdot 2\text{CH}_3\text{OH}$ , and  $6 \cdot \text{H}_2\text{O}$ .
